# Supplementary material for: Fecal Microbiota and Feeding Habitats of Nomadic Indigenous Animals (Deer, Yak, Sheep and Camel) in Baikal Siberia (Russia)
Source: MDPI journal article supplement (doi:10.3390/d16010052), 2024-01-13
Supplement: s1 [file s1]

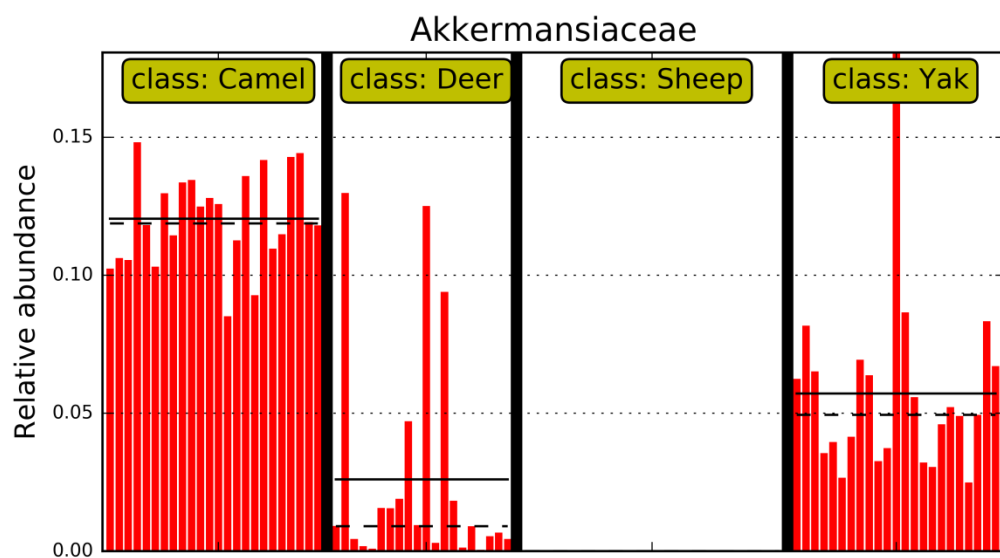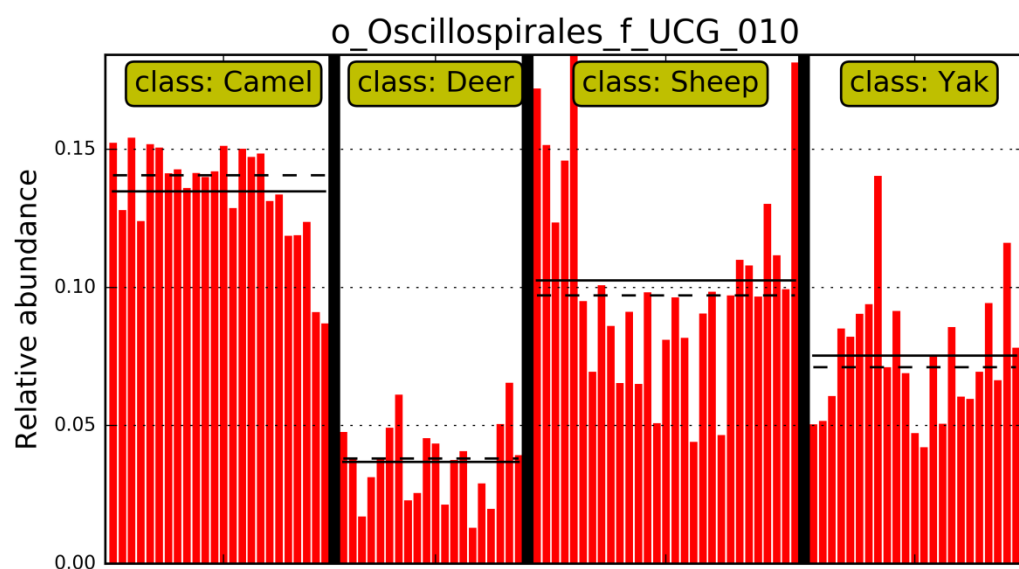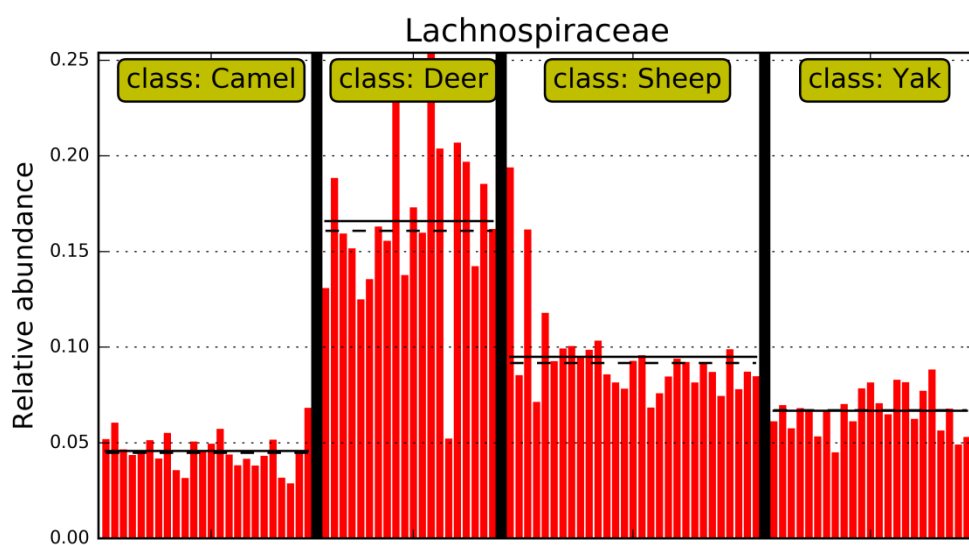

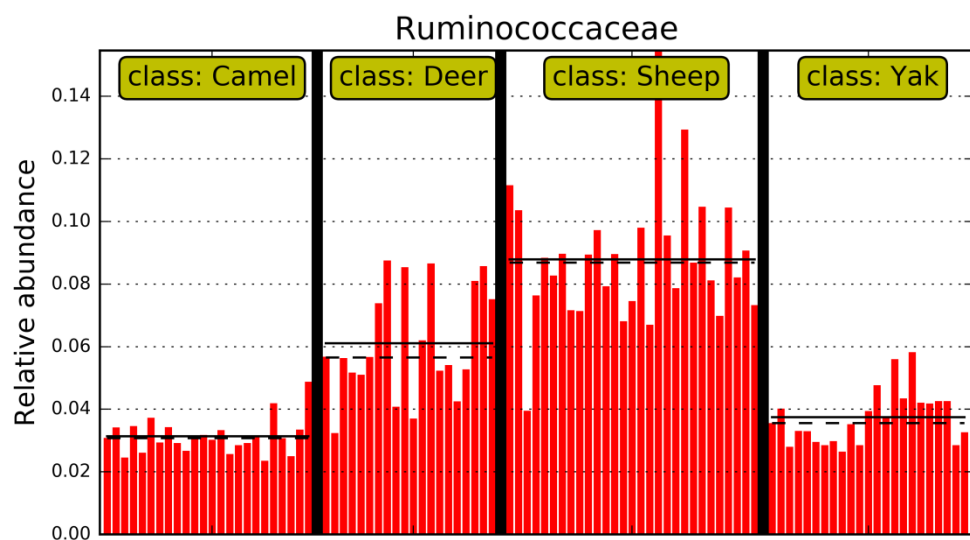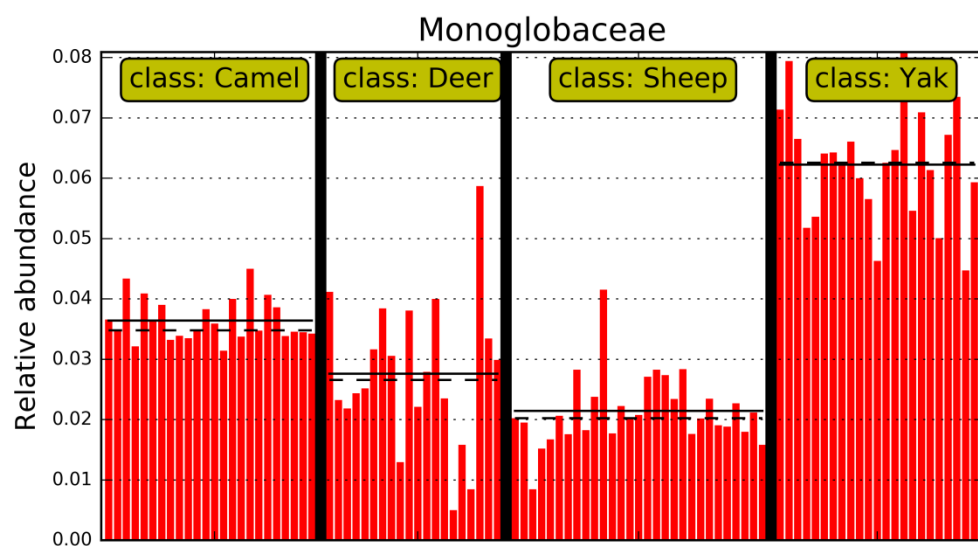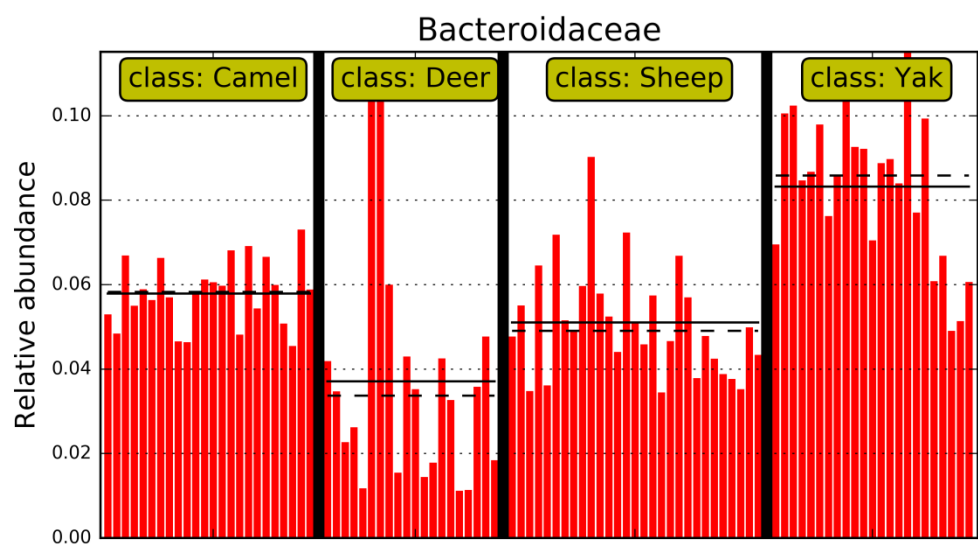

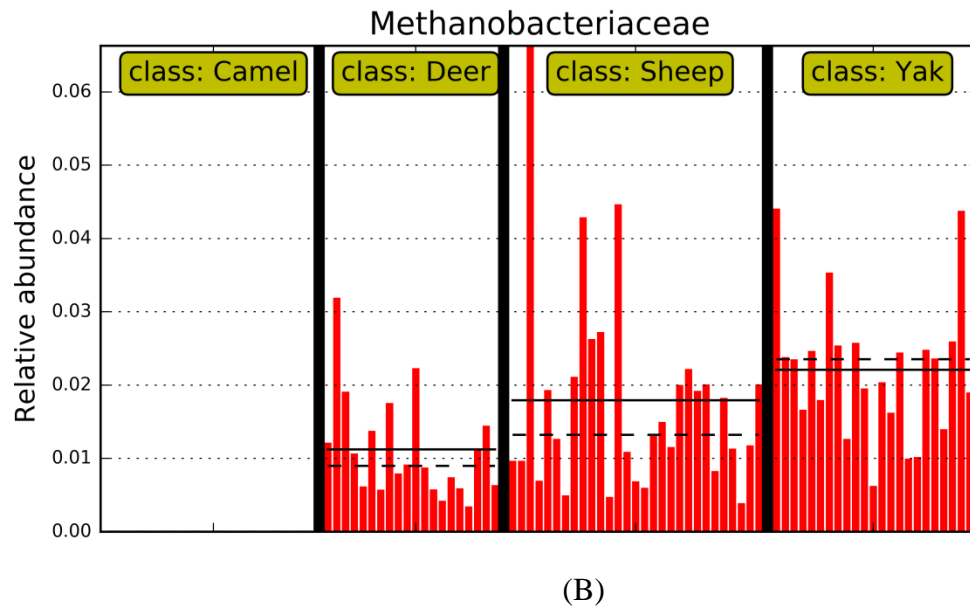

**Figure S5.** Linear discriminant analysis effect size of fecal microbiomes of nomadic animals.

The relative abundances of these families in the fecal microbiomes of individual animals. Mean and median values of the relative abundance of taxa are shown by solid and dotted lines, respectively.
