# Supplementary material for: Fecal Microbiota and Feeding Habitats of Nomadic Indigenous Animals (Deer, Yak, Sheep and Camel) in Baikal Siberia (Russia)
Source: MDPI journal article supplement (doi:10.3390/d16010052), 2024-01-13
Supplement: s1 [file s1]

Archive with 8 entries (8 files):
- Figure S1.pdf
- Figure S2.pdf
- Figure S3.pdf
- Figure S4.pdf
- Figure S5.pdf
- Figure S6.pdf
- Figure S7.pdf
- Table S1.pdf
