# Supplementary material for: Fecal Microbiota and Feeding Habitats of Nomadic Indigenous Animals (Deer, Yak, Sheep and Camel) in Baikal Siberia (Russia)
Source: MDPI journal article supplement (doi:10.3390/d16010052), 2024-01-13
Supplement: s1 [file s1 › Figure S6.pdf]

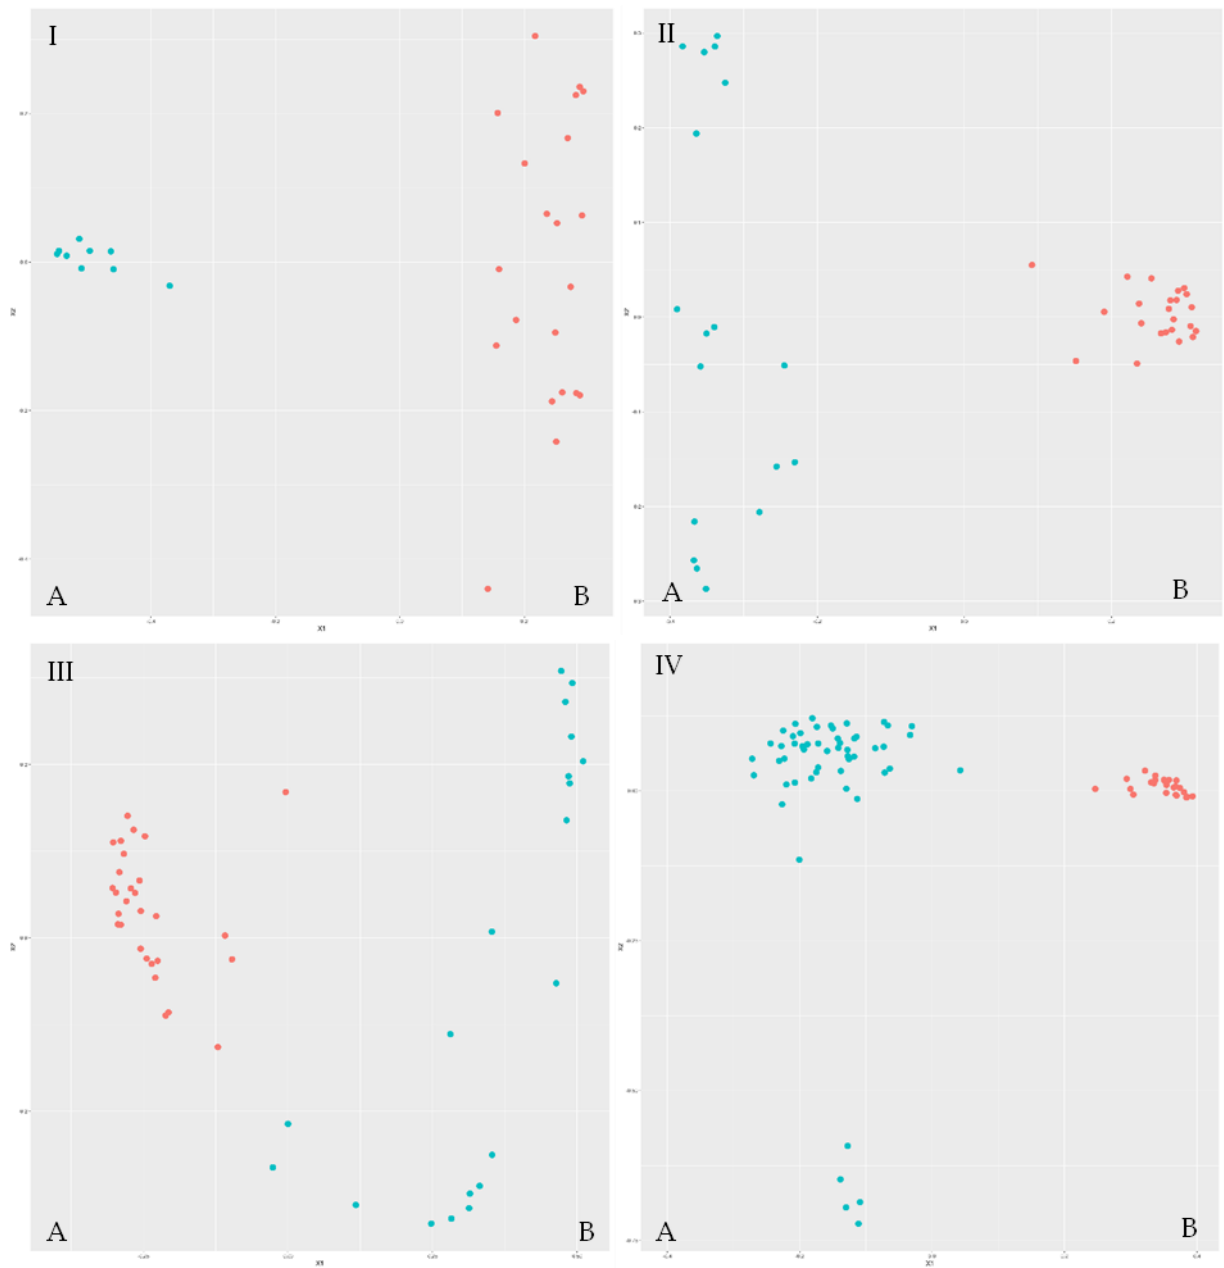

**Figure S6.** Multidimensional scaling (MDS) plots of the fecal microbiota in different animals:

I Deer (A- *Rangifer tarandus* of the Spitsbergen population; B- *Rangifer tarandus* of Tofalar population)

II Yak (A - *Bos grunniens* of the Qinghai-Tibetan Plateau population; *Bos grunniens* of the Okinsky population)

III Sheep (A - *Ovis aries* of the Buryat sheep population; (B - *Ovis aries* of the Hebei Province population)

IV Camel (A - *Camelus bactrianus* of the Altai population; B - *Camelus bactrianus* of the Transbaikal population)
