# Supplementary material for: Fecal Microbiota and Feeding Habitats of Nomadic Indigenous Animals (Deer, Yak, Sheep and Camel) in Baikal Siberia (Russia)
Source: MDPI journal article supplement (doi:10.3390/d16010052), 2024-01-13
Supplement: s1 [file s1 › Figure S7.pdf]

|                                                  | 1    | 2    | 3    | 4    | 5    | 6    | 7    | 8    | 9    | 10  | 11   | 12   | 13   | 14   | 15   | 16   | 17   | 18   | 19   | 20   | 21   | 22   | 23   | 24   |
|--------------------------------------------------|------|------|------|------|------|------|------|------|------|-----|------|------|------|------|------|------|------|------|------|------|------|------|------|------|
| <i>Paludicola</i>                                | 0,5  | 0,7  | 0,7  | 0,6  | 0,4  | 0,4  | 0,2  | 0,4  | 0,4  | 0,4 |      |      | -0,2 | -0,2 |      |      |      |      | -0,3 |      | -0,4 |      | -0,2 | -0,2 |
| <i>Prevotella</i>                                | 0,4  | 0,4  | 0,6  | 0,8  | 0,4  |      | 0,3  | 0,4  | 0,3  | 0,2 |      |      | -0,2 |      |      |      |      |      | -0,3 |      | -0,3 |      | -0,2 | -0,2 |
| <i>Anaerocolumna</i>                             | 0,4  | 0,4  | 0,6  | 0,5  | 0,6  |      |      |      | 0,3  |     |      |      |      |      |      |      |      |      | -0,3 |      | -0,3 |      | -0,2 |      |
| <i>Lachnospiraceae</i><br>AC2044_group           | 0,4  | 0,3  | 0,5  | 0,3  | 0,2  | 0,7  | 0,4  | 0,2  |      |     |      |      |      |      |      |      |      |      | -0,3 |      | -0,4 |      | -0,2 |      |
| <i>Roseburia</i>                                 | 0,3  | 0,6  | 0,5  | 0,6  | 0,3  | 0,2  | 0,2  | 0,5  | 0,4  | 0,5 |      |      |      |      |      |      |      |      | -0,3 |      | -0,3 |      | -0,3 | -0,2 |
| <i>Mutibaculaceae</i>                            | 0,5  | 0,6  | 0,8  | 0,6  | 0,5  | 0,2  | 0,3  | 0,5  | 0,3  | 0,3 |      |      | -0,2 |      |      |      |      |      | -0,3 |      | -0,4 | -0,2 | -0,3 | -0,2 |
| <i>[Ruminococcus]_</i><br><i>sauvignyi_group</i> | 0,4  | 0,7  | 0,4  | 0,4  | 0,3  |      |      | 0,5  | 0,3  | 0,7 |      |      |      |      |      |      |      |      | -0,3 |      | -0,3 |      | -0,2 |      |
| UCG-011                                          | 0,7  | 0,7  | 0,6  | 0,5  | 0,4  | 0,5  | 0,3  | 0,4  | 0,3  | 0,3 |      |      |      |      |      |      |      |      | -0,4 |      | -0,5 | -0,2 | -0,3 | -0,3 |
| <i>Lachnospiraceae</i><br>NK4A136_group          | 0,4  | 0,4  | 0,6  | 0,4  | 0,4  | 0,3  | 0,5  | 0,3  | 0,2  |     | -0,2 | -0,2 | -0,2 | -0,3 |      | -0,2 |      |      | -0,3 |      | -0,3 |      |      | -0,2 |
| <i>Phascolarctobacterium</i>                     | 0,5  | 0,4  | 0,5  | 0,5  | 0,3  | 0,3  | 0,3  | 0,3  | 0,5  | 0,3 |      |      |      |      |      |      |      |      | -0,3 | -0,2 | -0,4 | -0,2 | -0,3 | -0,3 |
| UCG-005                                          | 0,5  | 0,6  | 0,5  | 0,5  | 0,3  | 0,3  | 0,2  | 0,4  | 0,4  | 0,3 |      |      |      |      | 0,2  |      |      |      | -0,2 | -0,2 | -0,4 | -0,3 | -0,3 | -0,4 |
| <i>Paenibacillus</i>                             | 0,4  |      |      |      |      |      |      |      |      |     | 0,4  |      |      |      | 0,6  | 0,3  |      |      |      |      | -0,2 |      |      |      |
| <i>Prevotellaceae</i><br>UCG-004                 |      | -0,3 | -0,3 |      |      | -0,2 | -0,2 |      |      |     | 0,5  | 0,5  | 0,6  | 0,6  |      | 0,3  | 0,5  | 0,5  |      |      | -0,2 | -0,2 |      | -0,3 |
| p-2534-18B5_<br>gut_group                        |      | -0,2 | -0,3 | -0,2 | -0,3 |      |      |      |      |     | 0,6  | 0,6  | 0,6  | 0,6  |      | 0,6  | 0,7  | 0,6  |      |      | -0,3 |      | -0,2 | -0,2 |
| <i>Lachnospiraceae</i><br>FCS020_group           | 0,4  | 0,2  | 0,5  | 0,3  |      | 0,3  | 0,7  | 0,2  | 0,2  |     |      |      |      | -0,2 |      |      |      |      |      |      |      |      |      |      |
| <i>Lysinibacillus</i>                            |      |      |      |      |      |      |      |      |      |     |      |      |      |      |      |      |      |      |      | 0,5  |      |      |      |      |
| <i>Bacteroides</i>                               |      | -0,3 | -0,2 |      |      |      |      |      |      |     | 0,4  | 0,5  | 0,4  | 0,6  |      | 0,3  | 0,4  | 0,4  | 0,2  | -0,2 |      |      |      |      |
| NK4A214_group                                    |      |      |      | -0,2 |      |      |      |      |      |     | 0,4  | 0,5  | 0,3  | 0,5  |      | 0,5  | 0,4  | 0,4  | 0,3  |      |      |      |      |      |
| <i>Monoglobus</i>                                |      |      |      |      |      |      |      |      |      |     | 0,5  | 0,5  | 0,4  | 0,6  |      | 0,4  | 0,4  | 0,4  |      | -0,3 |      |      |      |      |
| dgA-11_gut_group                                 |      | -0,3 | -0,3 | -0,2 |      |      |      |      |      |     | 0,5  | 0,4  | 0,3  | 0,5  | 0,2  | 0,3  | 0,3  | 0,4  | 0,4  | -0,2 |      |      |      |      |
| <i>Alistipes</i>                                 | -0,3 | -0,3 | -0,3 | -0,3 |      |      | -0,3 |      | -0,2 |     |      |      |      | 0,4  |      |      |      |      | 0,4  | -0,2 | 0,5  |      | 0,4  |      |
| <i>Prevotellaceae</i><br>UCG-003                 | -0,2 | 0,3  |      |      |      |      |      |      |      | 0,5 |      |      |      | 0,3  |      |      |      |      | 0,2  |      | 0,3  |      |      |      |
| <i>Gastrophilales</i>                            | -0,2 | -0,3 | -0,3 |      |      |      | -0,2 |      |      |     |      |      |      |      |      |      |      |      | 0,5  | -0,2 | 0,7  | 0,2  | 0,4  | 0,4  |
| UCG-010                                          | -0,3 | -0,3 | -0,3 | -0,3 |      | -0,2 |      | -0,3 | -0,2 |     |      |      |      |      |      |      |      |      | 0,5  | -0,2 | 0,7  | 0,3  | 0,5  | 0,4  |
| F082                                             | -0,3 | -0,4 | -0,4 | -0,4 | -0,2 | -0,3 | -0,2 |      |      |     |      |      |      | 0,2  |      |      |      |      | 0,5  |      | 0,7  | 0,3  | 0,5  | 0,5  |
| WCHB1-41                                         | -0,4 | -0,3 | -0,3 | -0,2 |      |      |      | -0,3 |      |     | -0,2 | -0,2 | -0,2 |      | -0,2 | -0,2 |      |      | 0,2  |      | 0,5  | 0,5  | 0,3  | 0,4  |
| <i>Methanocorpusculum</i>                        | -0,3 |      |      |      |      |      |      | -0,3 |      |     | -0,3 | -0,2 | -0,3 |      | -0,2 |      | -0,3 | -0,2 | 0,4  |      | 0,7  |      | 0,5  | 0,5  |
| <i>Akkermansia</i>                               | -0,2 | -0,2 |      | -0,2 |      |      |      | -0,2 |      |     |      |      |      |      |      |      |      |      | 0,4  | -0,3 | 0,6  | 0,3  | 0,5  | 0,5  |
| M2PB4-<br>65_termite_group                       | -0,3 | -0,3 | -0,4 | -0,3 |      |      |      | -0,2 |      |     |      |      |      |      |      |      |      |      | 0,4  |      | 0,7  | 0,3  | 0,5  | 0,4  |
| <i>Bacteroidales</i><br>RF16_group               | -0,4 | -0,3 | -0,3 | -0,3 |      | -0,2 |      | -0,4 |      |     |      |      | 0,2  | -0,2 |      |      |      |      | 0,4  |      | 0,8  | 0,4  | 0,6  | 0,5  |
| <i>Maitella</i>                                  | -0,3 | -0,2 | -0,3 | -0,2 |      |      |      | -0,3 |      |     |      |      | -0,2 |      | -0,2 |      | -0,2 |      | 0,4  |      | 0,9  | 0,5  | 0,6  | 0,6  |
| <i>Clostridia_vadinBB60_</i><br>group            | -0,3 | -0,3 | -0,3 | -0,2 |      |      |      | -0,3 |      |     |      |      |      |      |      | -0,2 | -0,2 |      | 0,5  | -0,2 | 0,8  | 0,4  | 0,6  | 0,5  |

**Figure S7.** Pearson correlation of diet and fecal microbial taxa. Correlation coefficients  $r \leq 0.5$  with  $p \leq 0.05$  in at least one of the cases are presented. Columns correspond to plants from fecal samples: 1 - *Rheum rhubarb*; 2 - *Cladonia amaurocraea* (Florke) Schaer; 3 - *Eriophorum polystachion*; 4 - *Agropyron cristatum*; 5 - *Carex juncella*; 6 - *Artemisia dracunculus*; 7 - *Astragalus adsurgens*; 8 - *Thalictrum petaloideum*; 9 - *Goniolimon speciosum*; 10 - *Poa botryoides*; 11 - *Thermopsis lanceolata*; 12 - *Allium spendens*; 13 - *Potentilla anserina* L.; 14 - *Potentilla bifurca* L.; 15 - *Rheum compactum*; 16 - *Heteropappus biennis*; 17 - *Stipa krylovii*; 18 - *Descurainia sophia*; 19 - *Aster alpinus*; 20 - *Stipa capillata*; 21 - *Potentilla longifolia*; 22 - *Carex duriuscula*; 23 - *Saposhnikovia divaricata*; 24 - *Saussurea salicifolia*; rows correspond to bacterial taxa. Blue and red denote positive and negative association, respectively. The intensity of the colors represents the degree of association between the taxa abundances and plants.
