# Supplementary material for: Fecal Microbiota and Feeding Habitats of Nomadic Indigenous Animals (Deer, Yak, Sheep and Camel) in Baikal Siberia (Russia)
Source: MDPI journal article supplement (doi:10.3390/d16010052), 2024-01-13
Supplement: s1 [file s1 › Table S1.pdf]

Camel\_Yak\_Deer\_Sheep

| sample_IL_name | sample_name_by_pertners | SRA Acc. No. | Animal |
|----------------|-------------------------|--------------|--------|
| IL2265         | 1                       | SRR20217806  | Camel  |
| IL2266         | 2                       | SRR20217805  | Camel  |
| IL2267         | 3                       | SRR20217804  | Camel  |
| IL2268         | 4                       | SRR20217803  | Camel  |
| IL2269         | 5                       | SRR20217802  | Camel  |
| IL2270         | 6                       | SRR20217783  | Camel  |
| IL2271         | 7                       | SRR20217782  | Camel  |
| IL2272         | 8                       | SRR20217781  | Camel  |
| IL2273         | 9                       | SRR20217779  | Camel  |
| IL2274         | 10                      | SRR20217778  | Camel  |
| IL2275         | 11                      | SRR20217777  | Camel  |
| IL2276         | 12                      | SRR20217776  | Camel  |
| IL2277         | 13                      | SRR20217775  | Camel  |
| IL2278         | 14                      | SRR20217774  | Camel  |
| IL2279         | 15                      | SRR20217773  | Camel  |
| IL2280         | 16                      | SRR20217772  | Camel  |
| IL2281         | 17                      | SRR20217771  | Camel  |
| IL2282         | 18                      | SRR20217770  | Camel  |
| IL2283         | 19                      | SRR20217768  | Camel  |
| IL2284         | 20                      | SRR20217767  | Camel  |
| IL2285         | 21                      | SRR20217766  | Camel  |
| IL2286         | 22                      | SRR20217765  | Camel  |
| IL2287         | 23                      | SRR20217764  | Camel  |
| IL2288         | 24                      | SRR20217763  | Camel  |
| IL2794         | 40-22                   | SRR24046305  | Deer   |
| IL2795         | 41-22                   | SRR24046457  | Deer   |
| IL2796         | 42-22                   | SRR24046392  | Deer   |
| IL2797         | 43-22                   | SRR24046391  | Deer   |
| IL2799         | 45-22                   | SRR24046390  | Deer   |
| IL2800         | 46-22                   | SRR24046389  | Deer   |
| IL2801         | 47-22                   | SRR24046388  | Deer   |
| IL2802         | 48-22                   | SRR24046387  | Deer   |
| IL2803         | 49-22                   | SRR24046386  | Deer   |
| IL2804         | 50-22                   | SRR24046385  | Deer   |
| IL2805         | 51-22                   | SRR24046384  | Deer   |
| IL2806         | 52-22                   | SRR24046382  | Deer   |
| IL2808         | 54-22                   | SRR24046381  | Deer   |
| IL2809         | 55-22                   | SRR24046380  | Deer   |
| IL2811         | 57-22                   | SRR24046379  | Deer   |
| IL2812         | 58-22                   | SRR24046378  | Deer   |
| IL2813         | 59-22                   | SRR24046377  | Deer   |
| IL2814         | 60-22                   | SRR24046376  | Deer   |
| IL2815         | 61-22                   | SRR24046375  | Deer   |
| IL2816         | 62-22                   | SRR24046374  | Deer   |
| IL2817         | 63-22                   | SRR24046373  | Deer   |
| IL2762         | 78-22                   | SRR24046403  | Sheep  |
| IL2763         | 80-2                    | SRR24046402  | Sheep  |
| IL2764         | 81-22                   | SRR24046400  | Sheep  |
| IL2765         | 82-22                   | SRR24046399  | Sheep  |
| IL2766         | 88-22                   | SRR24046398  | Sheep  |
| IL2767         | 89-22                   | SRR24046397  | Sheep  |
| IL2768         | 93-22                   | SRR24046396  | Sheep  |
| IL2769         | 94-22                   | SRR24046395  | Sheep  |
| IL2770         | 96-22                   | SRR24046394  | Sheep  |

Camel\_Yak\_Deer\_Sheep

|        |          |             |       |
|--------|----------|-------------|-------|
| IL2771 | 99-22    | SRR24046393 | Sheep |
| IL2772 | 100-22   | SRR24046328 | Sheep |
| IL2773 | 101 - 22 | SRR24046327 | Sheep |
| IL2774 | 103 - 22 | SRR24046325 | Sheep |
| IL2775 | 104 - 22 | SRR24046324 | Sheep |
| IL2776 | 112-22   | SRR24046323 | Sheep |
| IL2777 | 115-22   | SRR24046322 | Sheep |
| IL2778 | 118-22   | SRR24046321 | Sheep |
| IL2779 | 119-22   | SRR24046320 | Sheep |
| IL2780 | 121 - 22 | SRR24046319 | Sheep |
| IL2781 | 124-22   | SRR24046318 | Sheep |
| IL2782 | 125-22   | SRR24046317 | Sheep |
| IL2783 | 126-22   | SRR24046316 | Sheep |
| IL2784 | 128-22   | SRR24046314 | Sheep |
| IL2785 | 130-22   | SRR24046313 | Sheep |
| IL2787 | 134-22   | SRR24046312 | Sheep |
| IL2788 | 138-22   | SRR24046311 | Sheep |
| IL2789 | 140 - 22 | SRR24046310 | Sheep |
| IL2790 | 145-22   | SRR24046309 | Sheep |
| IL2791 | 150-22   | SRR24046308 | Sheep |
| IL2728 | 1-22     | SRR24046255 | Yak   |
| IL2729 | 2-22     | SRR24046254 | Yak   |
| IL2730 | 3-22     | SRR24046253 | Yak   |
| IL2731 | 4-22     | SRR24046252 | Yak   |
| IL2732 | 5-22     | SRR24046251 | Yak   |
| IL2733 | 6-22     | SRR24046249 | Yak   |
| IL2734 | 7-22     | SRR24046248 | Yak   |
| IL2735 | 8-22     | SRR24046247 | Yak   |
| IL2736 | 9-22     | SRR24046246 | Yak   |
| IL2738 | 11-22    | SRR24046245 | Yak   |
| IL2739 | 12-22    | SRR24046244 | Yak   |
| IL2740 | 13-22    | SRR24046243 | Yak   |
| IL2741 | 14-22    | SRR24046242 | Yak   |
| IL2742 | 15-22    | SRR24046241 | Yak   |
| IL2743 | 16-22    | SRR24046424 | Yak   |
| IL2744 | 17-22    | SRR24046422 | Yak   |
| IL2745 | 18-22    | SRR24046421 | Yak   |
| IL2746 | 19-22    | SRR24046420 | Yak   |
| IL2747 | 20-22    | SRR24046419 | Yak   |
| IL2748 | 21-22    | SRR24046418 | Yak   |
| IL2749 | 22 -22   | SRR24046417 | Yak   |
| IL2750 | 23-22    | SRR24046416 | Yak   |
| IL2751 | 24-22    | SRR24046415 | Yak   |
