# Supplementary figures and images for: Fecal Microbiota and Feeding Habitats of Nomadic Indigenous Animals (Deer, Yak, Sheep and Camel) in Baikal Siberia (Russia)
Source: MDPI journal article supplement (doi:10.3390/d16010052), 2024-01-13

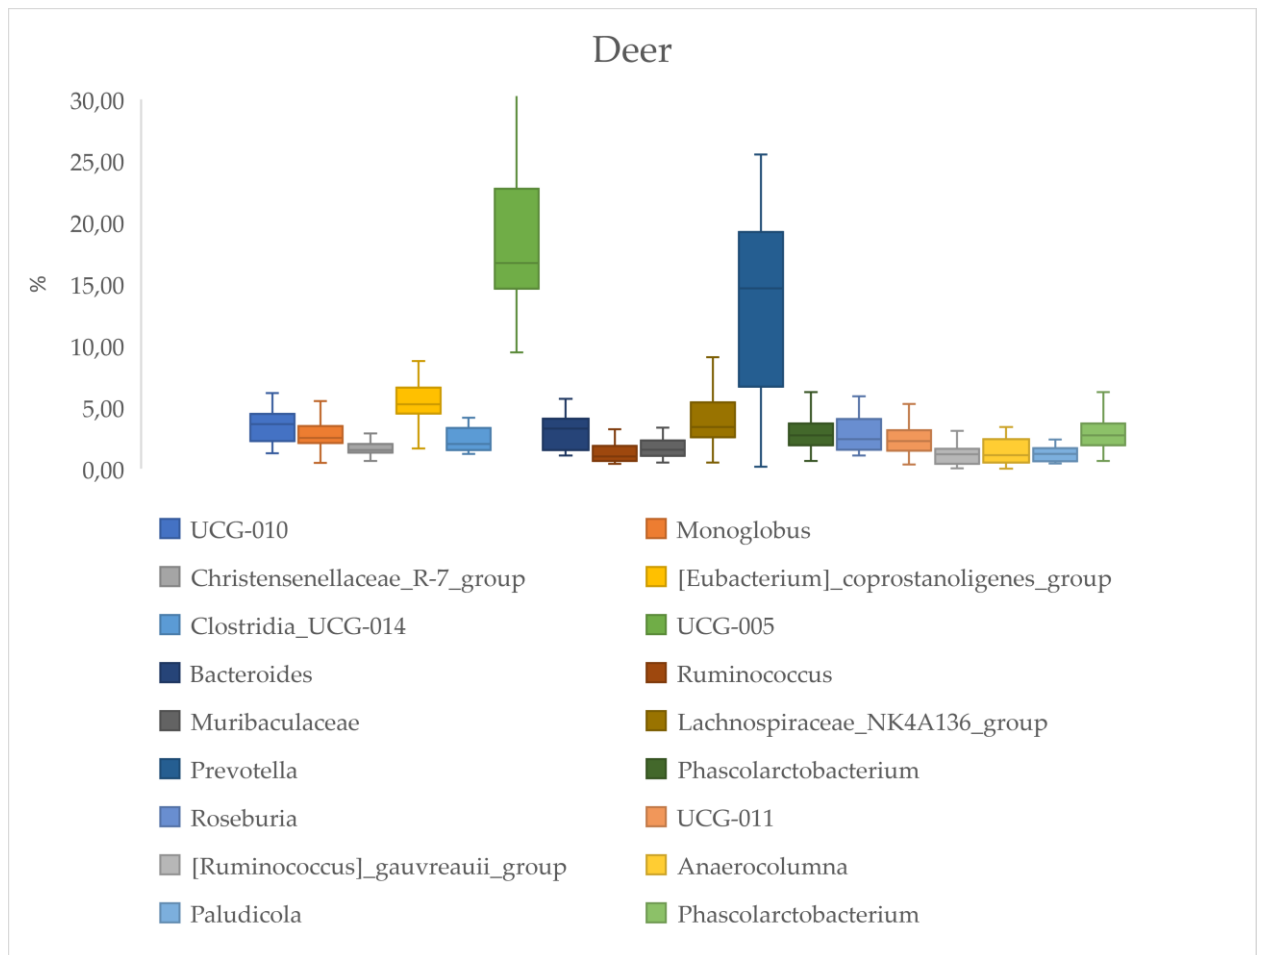

**Figure S1.** Relative abundance of fecal microbiota of Deer

Supplement: s1 [file s1]

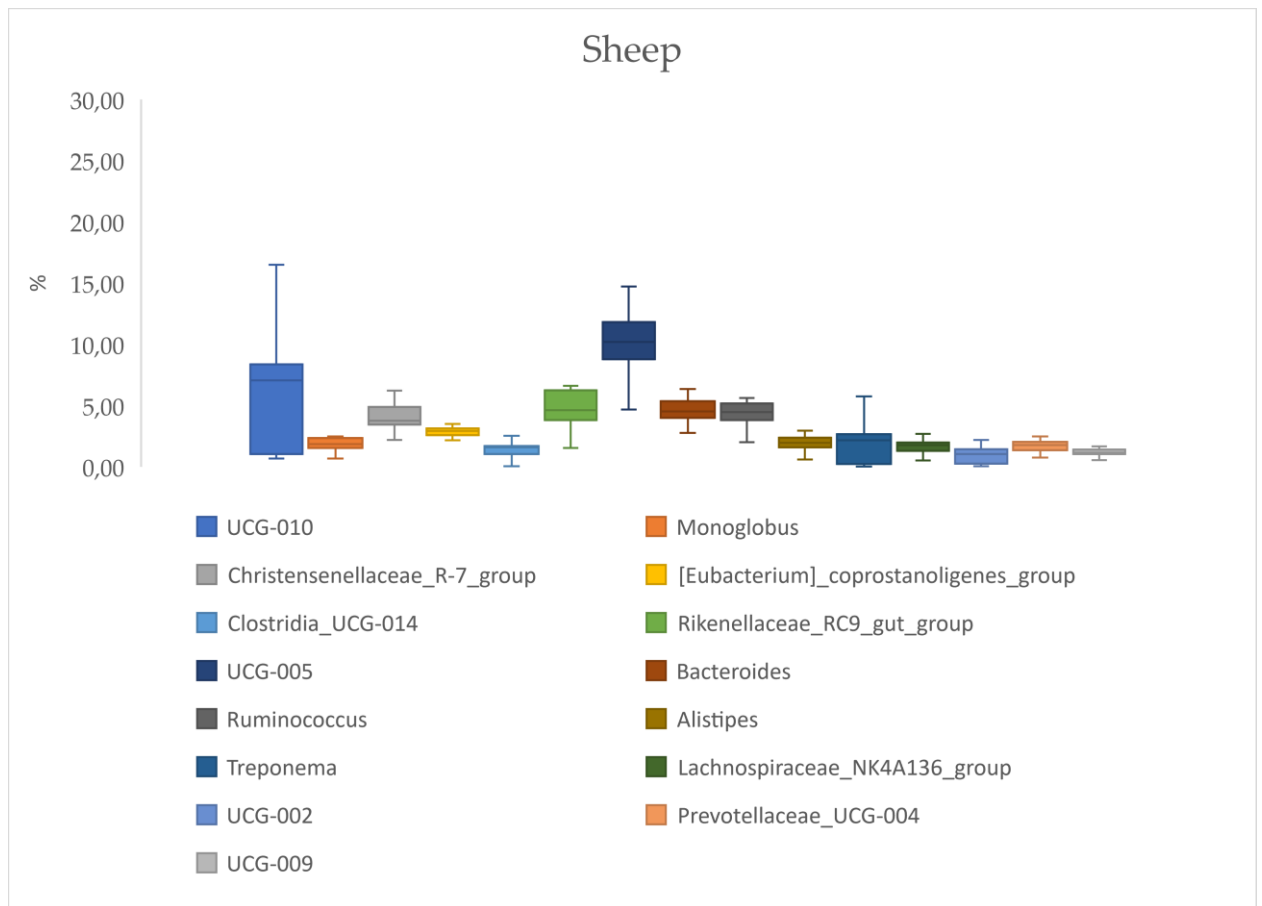

**Figure S3.** Relative abundance of fecal microbiota of Sheep.

Supplement: s1 [file s1]

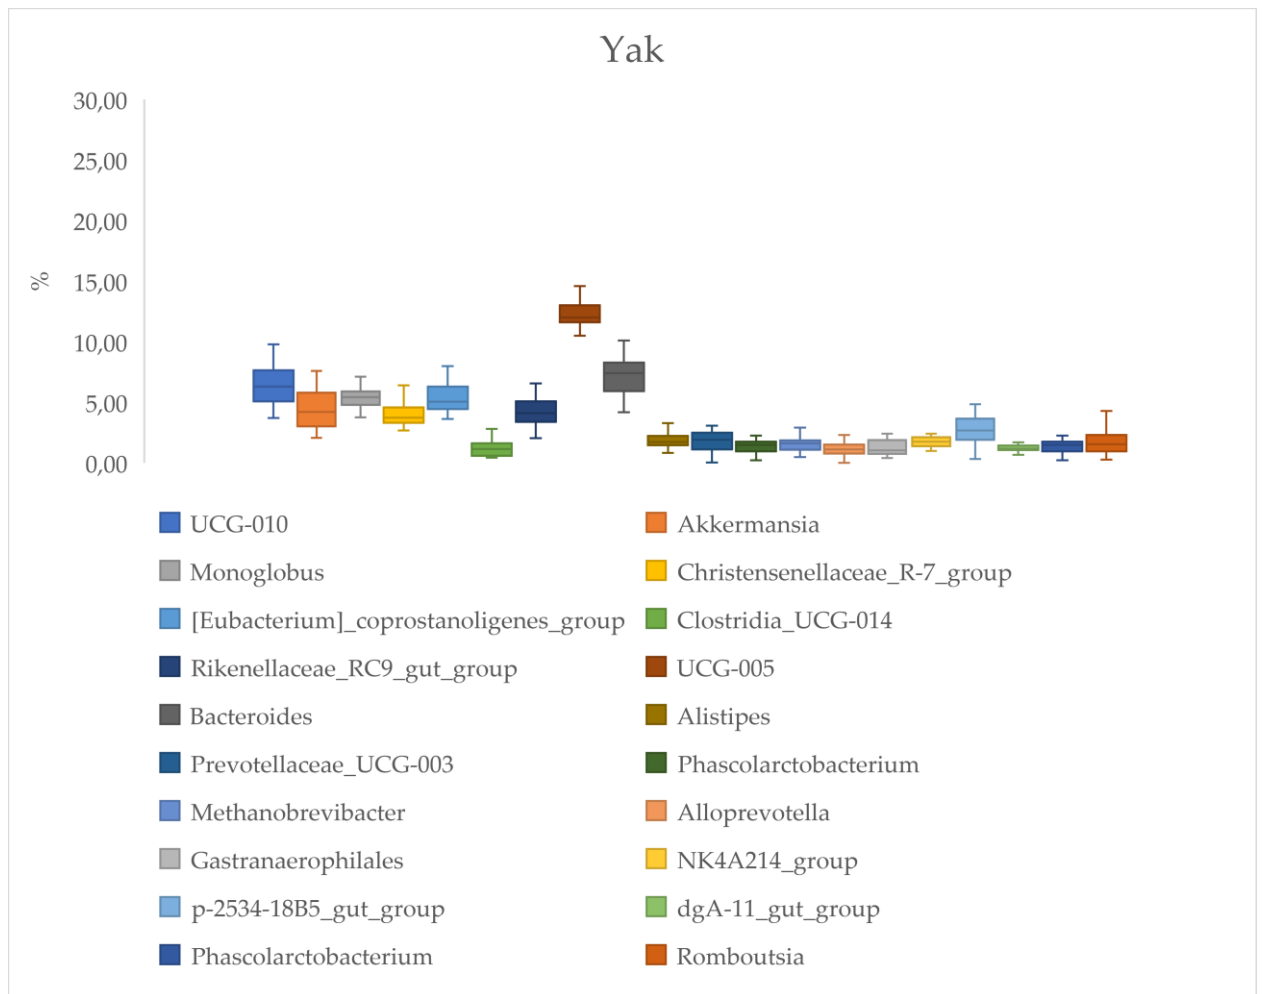

**Figure S2.** Relative abundance of fecal microbiota of Yak.

Supplement: s1 [file s1 › Figure S2.pdf]

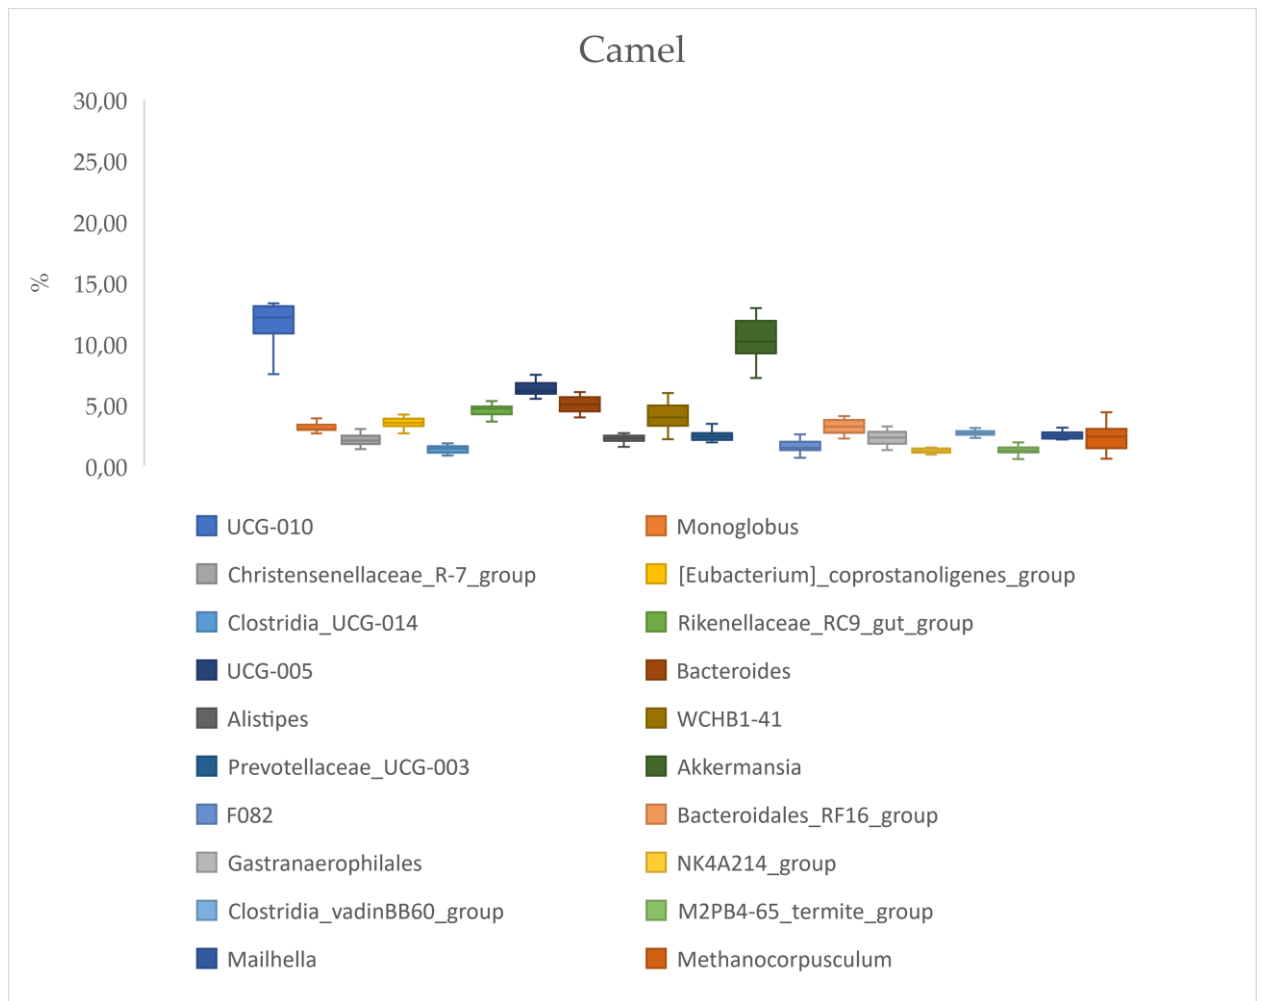

**Figure S4.** Relative abundance of fecal microbiota of Camel.

Supplement: s1 [file s1 › Figure S4.pdf]
